# Supplementary material
Source: Springer Nature journal article supplement (https://www.springermedizin.de/resource/supplementary/12913_2006_493_MOESM3_ESM.pdf/9534868)
Supplement: MOESM3 [file 9534868]

| <b>Condition</b>                                             | <b>Pneumonia</b>                                  | <b>Diarrhoea</b>      | <b>HIV/AIDS</b>                               | <b>HIV/AIDS</b>                         | <b>HIV transmission from mother to child</b> | <b>Tuberculosis + HIV</b> | <b>Tuberculosis</b>  | <b>Malaria</b>                             | <b>Malaria</b>       |
|--------------------------------------------------------------|---------------------------------------------------|-----------------------|-----------------------------------------------|-----------------------------------------|----------------------------------------------|---------------------------|----------------------|--------------------------------------------|----------------------|
| <b>Intervention</b>                                          | Integrated Management of Childhood Illness (IMCI) | Safe water (software) | Highly active anti-retroviral therapy (HAART) | Voluntary Counselling and Testing (VCT) | Single dose Nevirapine (targeted treatment)  | Community based DOTS      | Community based DOTS | Intermittent treatment of pregnant mothers | Impregnated bed nets |
| <b>Annual risk (%) of death/disease without intervention</b> | 7.7                                               | 1.3                   | > 30                                          | 1.9 (risk of HIV)                       | 25-35 (risk of HIV transmission)             | >> 42                     | 42                   | NA                                         | 1.9                  |
| <b>Efficacy (%) Relative risk reduction of mortality</b>     | 80 %                                              | 20 %                  | 73 %                                          | 895/10 000 (cases averted)              | 47                                           | 78 (cure rate)            | 78 (cure rate)       | 205/10 000 (deaths averted)                | 19                   |

NA = Not available
